# Supplementary material for: Efficient MnFe/Al2O3 catalyst for NH3-SCR of NO at low temperature: the influence of strong interactions between active components and the carrier
Source: Royal Society of Chemistry journal article supplement (doi:10.1039/d4cy00158c), 2024-01-01
Supplement: d4cy00158c1.pdf [file d4cy00158c1.pdf]

## Appendix A. Supplementary data

### Efficient FeMn/Al<sub>2</sub>O<sub>3</sub> catalyst for NH<sub>3</sub>-SCR of NO at low temperature: the Influence of Strong Interactions Between Active Components and Carrier

*Qian Xu<sup>a,b,c,d</sup>, Zhihong Zheng<sup>\*a,c,d</sup>, Jinjing Luo<sup>\*b</sup>, Zheng Lai<sup>a,c,d</sup>, Jianwen Chen<sup>a,c,d</sup>, Jiaxin Shang<sup>a,c,d</sup>*

<sup>a</sup>Xiamen Zhongchuang Environmental Protection Technology Co., Ltd., Xiamen, 361101, China.

<sup>b</sup>College of Environment and Ecology, Xiamen University, Xiamen, 361105, China.

<sup>c</sup>Fujian Provincial Key Laboratory of Bag Filter Materials and Technology, Xiamen Zhongchuang Environmental Protection Technology Co., Ltd., Xiamen, 361101, China.

<sup>d</sup>Xiamen Key Laboratory of Bag Filter Materials and Technology, Xiamen Zhongchuang Environmental Protection Technology Co., Ltd., Xiamen, 361101, China.

\* Corresponding Author: E-mail: [328936042@qq.com](mailto:328936042@qq.com) (Zhihong Zheng) ;

[luojj27@xmu.edu.cn](mailto:luojj27@xmu.edu.cn) (Jinjing Luo)

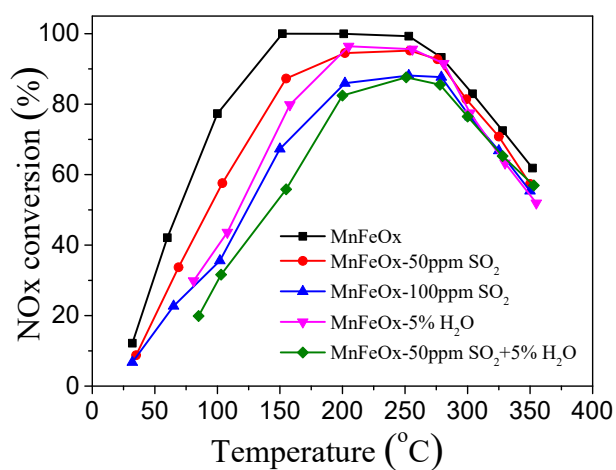

Fig. S1. Effect of H<sub>2</sub>O or/and SO<sub>2</sub> on the activities of MnFeOx.

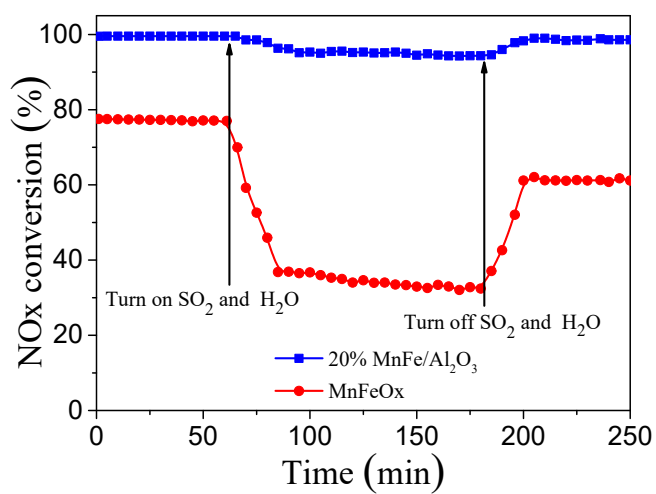

Fig. S2. H<sub>2</sub>O and SO<sub>2</sub> tolerance test of the MnFeOx and 20% MnFe/Al<sub>2</sub>O<sub>3</sub> catalysts at 100 °C.

Fig. S3. The SEM images of the MnFeOx (a) and 20% MnFe/Al<sub>2</sub>O<sub>3</sub> (b) catalysts .

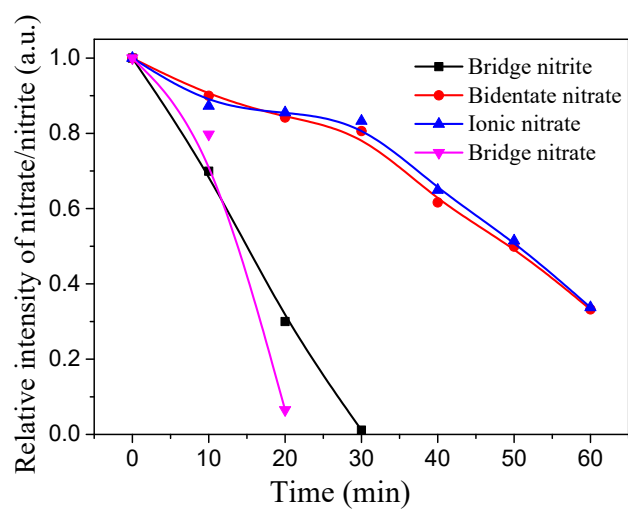

Fig. S4. Relative intensity of nitrate/nitrite consumption over time on 20% MnFe/Al<sub>2</sub>O<sub>3</sub>.
